# Supplementary material
Source: Springer Nature journal article supplement (https://www.springermedizin.de/resource/supplementary/12865_2009_309_MOESM5_ESM.pdf/9427720)

### PGN

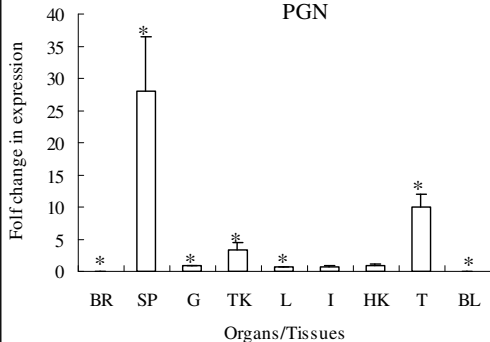

### LPS

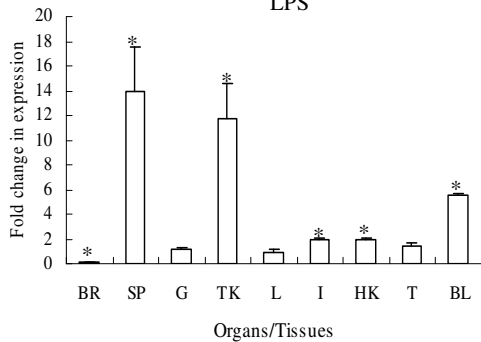

### Poly I:C

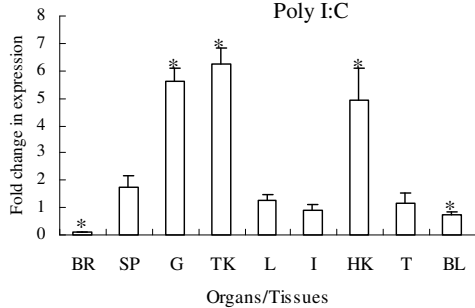

### PHA

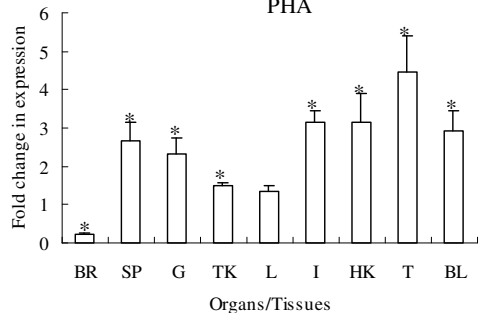

Supplement: MOESM5 [file 9427720]
